# Supplementary material for: The ERK–ZEB1 pathway mediates epithelial–mesenchymal transition in pemetrexed resistant lung cancer cells with suppression by vinca alkaloids
Source: PubMed Central journal article supplement — Oncogene. 2016 Jun 6;36(2):242–53. doi: 10.1038/onc.2016.195 (PMC5241427; doi:10.1038/onc.2016.195), 2016-06-06
Supplement: onc2016195x2.pdf [file onc2016195x2.pdf]

## Supplementary Figure 2



**Inhibition of ERK by siRNA technology to correlate the EMT suppression in pemetrexed-resistant CL1/A200 cells.**

The cells of CL1/A200 ( $5 \times 10^5$  cells) were plated in 60-mm Petri-dishes followed by transfection with two different sequences of siRNA to inhibit ERK expression (siERK#1 and siERK#2). After 48 h incubation, the cells were harvested for pERK, ERK, ZEB1, E-cadherin and fibronectin protein detection (a) or seeded for transwell 24 h migration assay (b) and 48 h migration assay (c) using  $2 \times 10^4$  cells. Similarly, the expression of p38 was inhibited by two individual siRNAs and examined (d-f). A mixture of ZEB1 siRNAs were transfected into CL1/A200 cells and the effects of inhibited ZEB1 were analyzed by Western blots (g), migration (h) and invasion (i) assays. Similarly, fibronectin siRNAs were transfected into cells and analyzed (j-l). \* $p < 0.05$  was considered statistically significant.
