# Supplementary material for: The ERK–ZEB1 pathway mediates epithelial–mesenchymal transition in pemetrexed resistant lung cancer cells with suppression by vinca alkaloids
Source: PubMed Central journal article supplement — Oncogene. 2016 Jun 6;36(2):242–53. doi: 10.1038/onc.2016.195 (PMC5241427; doi:10.1038/onc.2016.195), 2016-06-06
Supplement: onc2016195x3.pdf [file onc2016195x3.pdf]

### Supplementary Figure 3

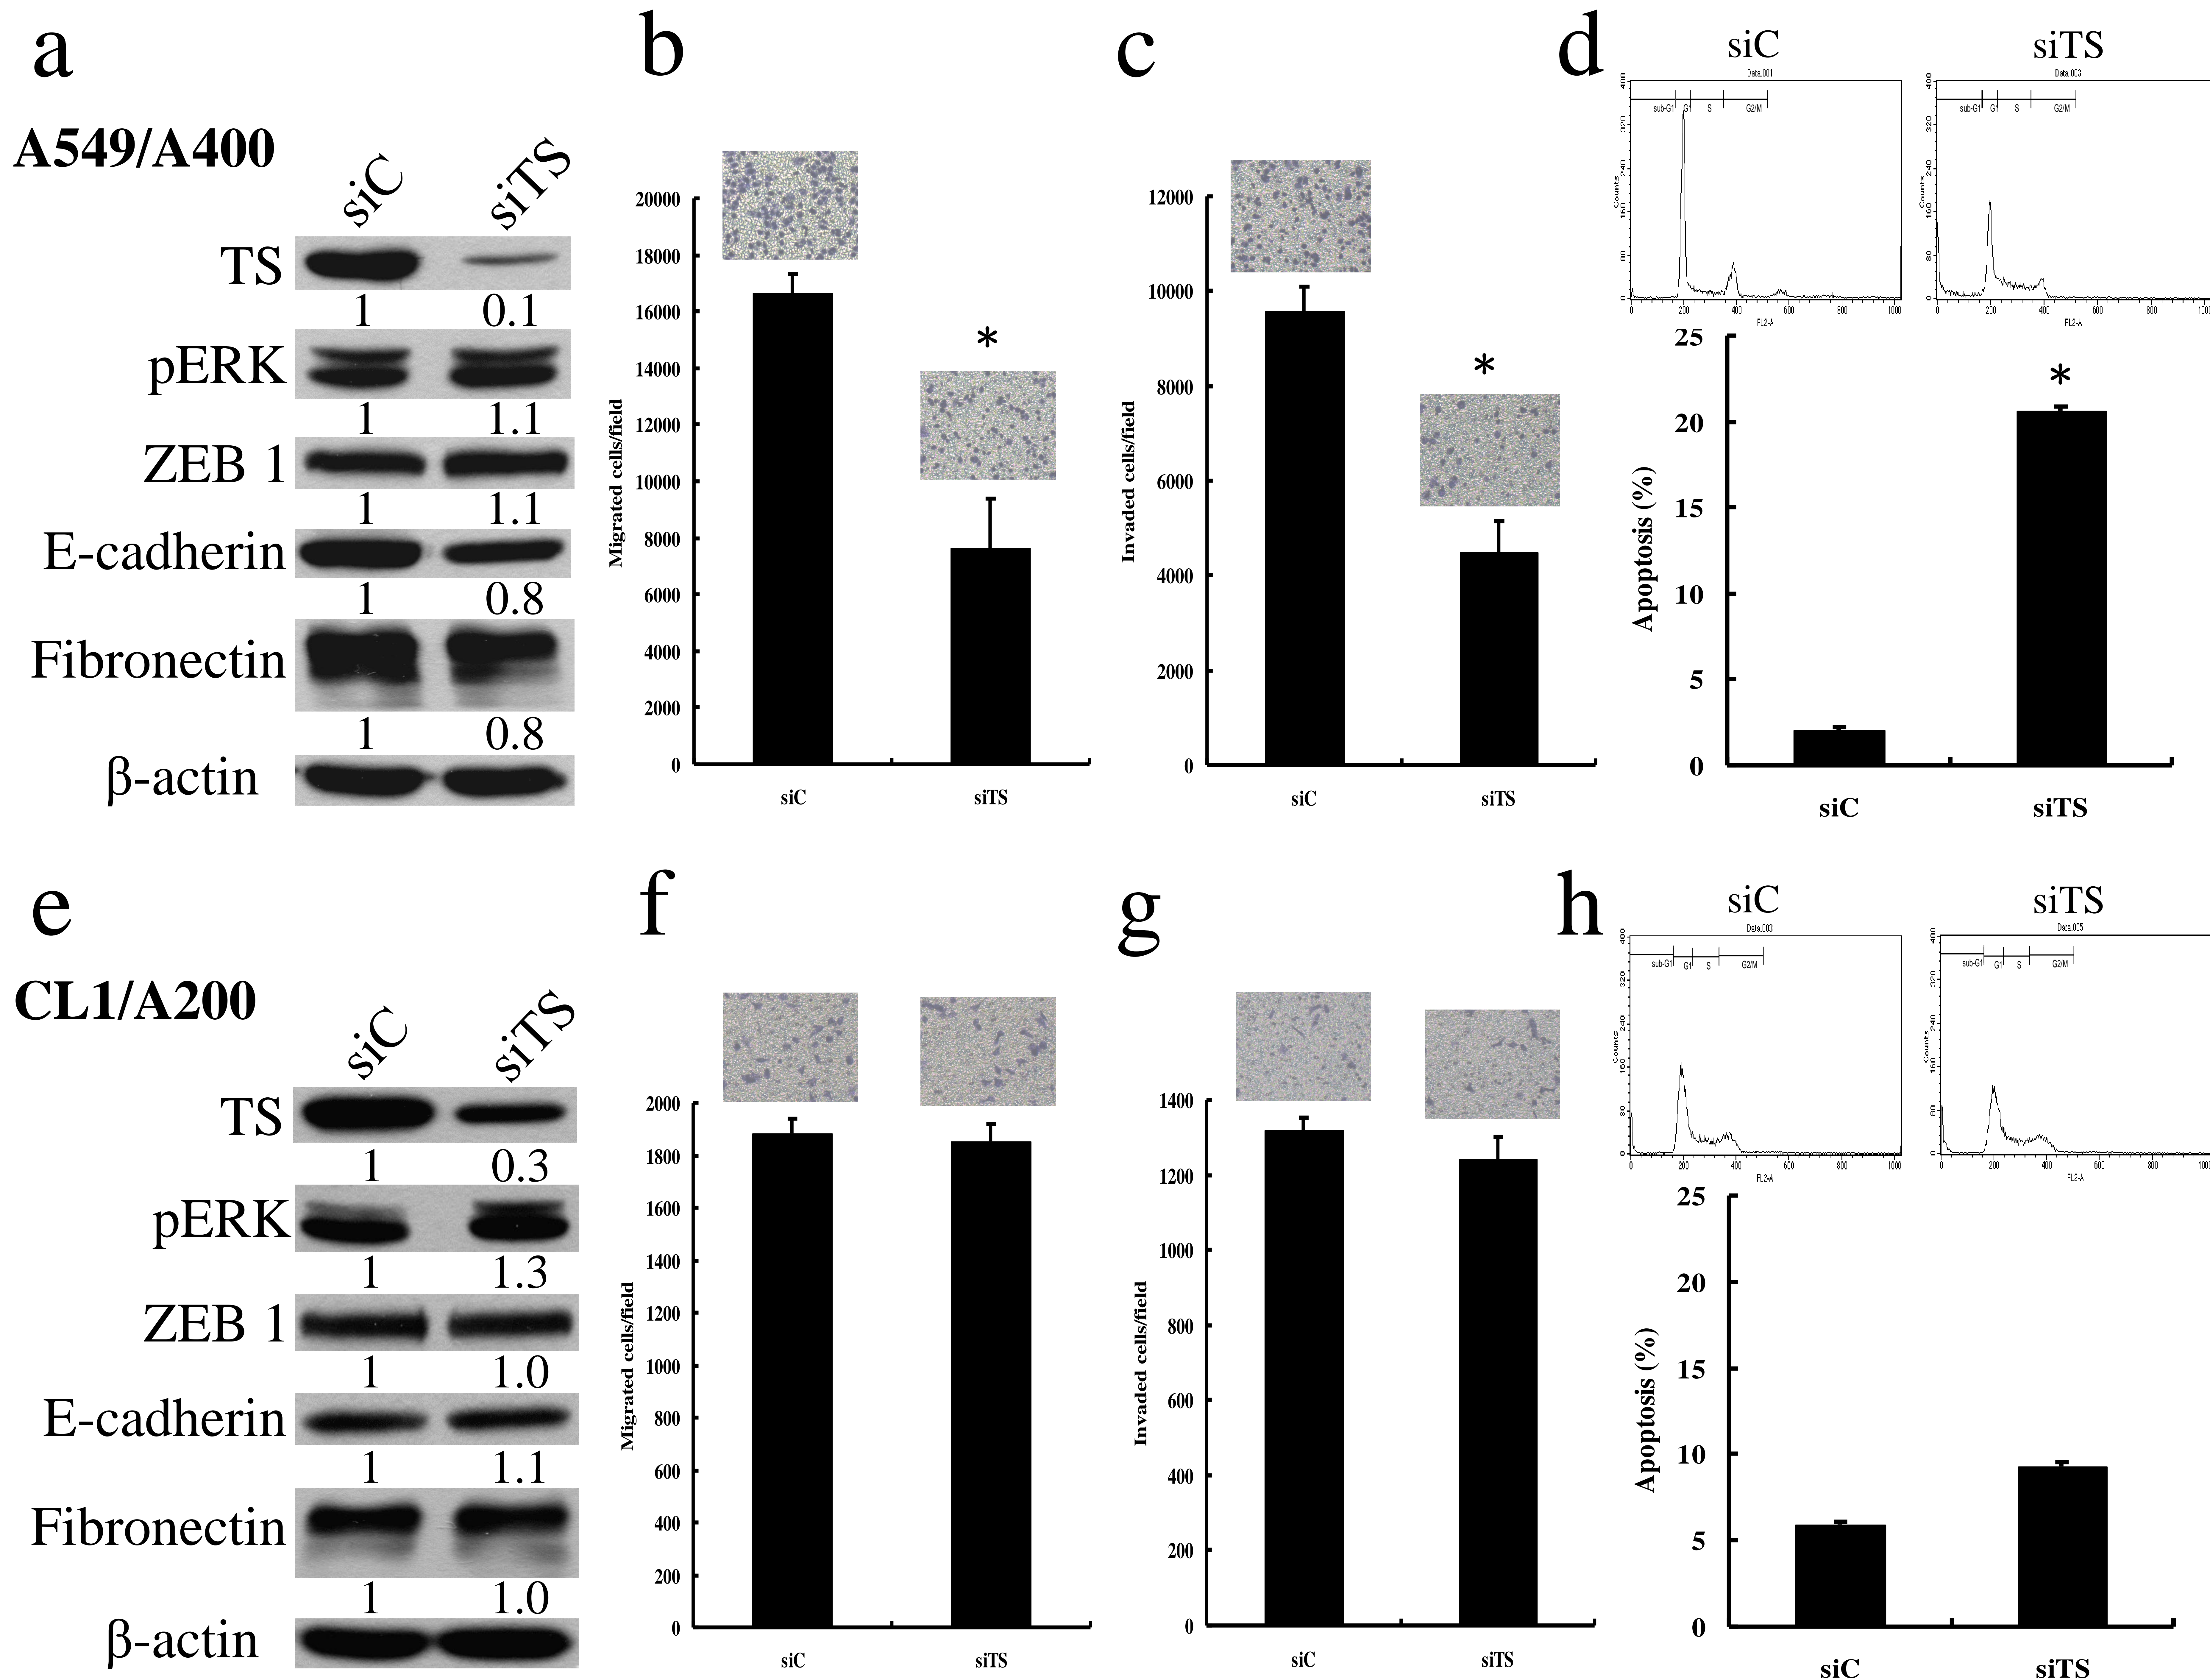

#### The role of TS in ERK/ZEB1 signaling pathway.

The cells ( $5 \times 10^5$  cells) were plated in 60-mm Petri-dishes followed by transfection with siRNA to inhibit TS expression. After 48 h incubation, the cells were harvested for pERK, ERK, ZEB1, E-cadherin and fibronectin protein detection (a) or seeded for transwell migration assay (b) and migration assay (c) using  $2 \times 10^4$  cells. The transfected cells also analyzed by Flow cytometry with PI staining to evaluate Sub-G1 ratio (d). The same procedures were also applied to CL1/A200 cells and the results were demonstrated in e-h.
