# Supplementary material for: The ERK–ZEB1 pathway mediates epithelial–mesenchymal transition in pemetrexed resistant lung cancer cells with suppression by vinca alkaloids
Source: PubMed Central journal article supplement — Oncogene. 2016 Jun 6;36(2):242–53. doi: 10.1038/onc.2016.195 (PMC5241427; doi:10.1038/onc.2016.195), 2016-06-06
Supplement: onc2016195x4.pdf [file onc2016195x4.pdf]

## Supplementary Figure 4



### The effects of vincristine (VCR) on ERK phosphorylation.

Expression of ZEB1, E-cadherin and fibronectin in CL1/A200 cells treated with 2.5 and 5 nM of VCR were investigated by Western blot analysis (a). The mRNA levels of ZEB1, E-cadherin and fibronectin were analyzed by RT-PCR (b). The cell viability with VCR (2.5 nM) was examined by MTT assay (c). The effects of VCR on migration (d) and invasion were determined (e). \* $p < 0.05$  was considered statistically significant.

Sequences of primers for ZEB1 (F-5'-TTCAGCATCACCAGGCAGTC, R-5'-GAGTGGAGGAGGCTGAGTAG), for E-cadherin (F-5'-TGGAAAGACACTGCCAACTG, R-5'-AGGCTGTGCCTTCTACAGA) and for fibronectin (F-5'-CCGTGGGCAACTCTGTGTC, R-5'-TGCGGCAGTTGTCACAG).
