# Supplementary material for: The ERK–ZEB1 pathway mediates epithelial–mesenchymal transition in pemetrexed resistant lung cancer cells with suppression by vinca alkaloids
Source: PubMed Central journal article supplement — Oncogene. 2016 Jun 6;36(2):242–53. doi: 10.1038/onc.2016.195 (PMC5241427; doi:10.1038/onc.2016.195), 2016-06-06
Supplement: onc2016195x5.pdf [file onc2016195x5.pdf]

## Supplementary Figure 5



### High magnification pictures (10 x 100) of immunohistochemistry (IHC).

The representative lung tumors of A549 and A549/A400 were removed, fixed, and embedded in paraffin, which was then sectioned into 4  $\mu$  m layers analyzed by IHC with the indicated antibody and photography by Microscope Axio Imager.A2 (Carl Zeiss Microscopy, LLC. Thornwood, NY, USA).
